# Supplementary material for: Solvent effect on electron and proton transfer in the excited state of a hydrogen bonded phenol–imidazole complex
Source: Royal Society of Chemistry journal article supplement (doi:10.1039/c4ra05306k), 2014-01-01
Supplement: c4ra05306k1.pdf [file c4ra05306k1.pdf]

**Electronic Supplementary Information**

**Solvent Effect on Electron and Proton Transfer in the Excited  
State of Hydrogen Bonded Phenol-Imidazole Complex**

Baotao Kang,<sup>a,†</sup> Hu Shi,<sup>a,†</sup> Shihai Yan,<sup>b,\*</sup> Jin Yong Lee<sup>a,\*</sup>

<sup>a</sup> Department of Chemistry, Sungkyunkwan University, Suwon, 440746, Korea

<sup>b</sup> College Of Chemistry and Pharmaceutical Sciences, Qingdao Agricultural University,

Qingdao, 266109, P. R. China

<sup>†</sup> These authors equally contributed to this work

**Contents**

**Fig S1.** Initial structure of PH-IM in water box with cubic length of 22 Å for QM/MM calculation

**Fig S2.** Behaviors of  $R_{O-N}$  and  $\angle_{COH}$  both in vacuum and water.

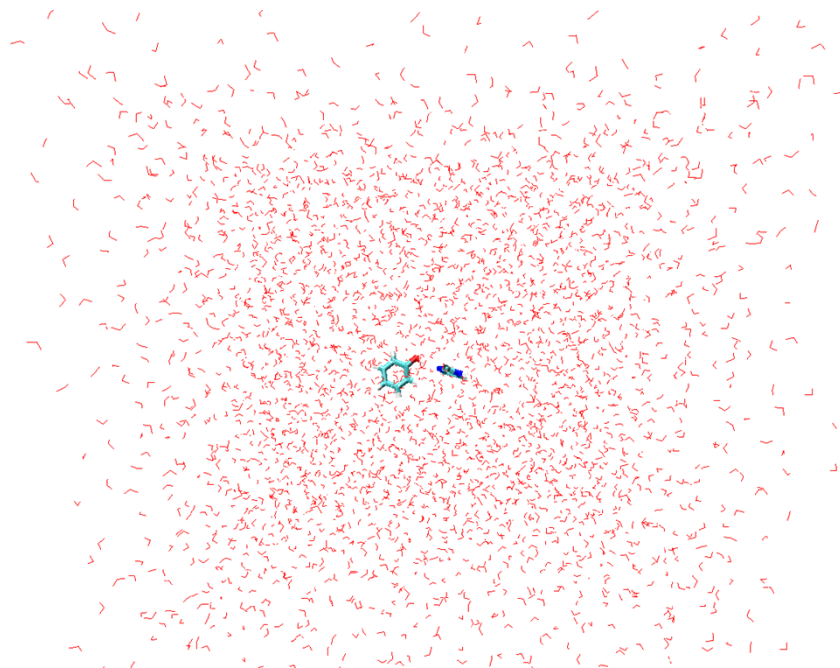

**Fig S1.** Initial structure of PH-IM in water box with cubic length of 22 Å for QM/MM

calculation

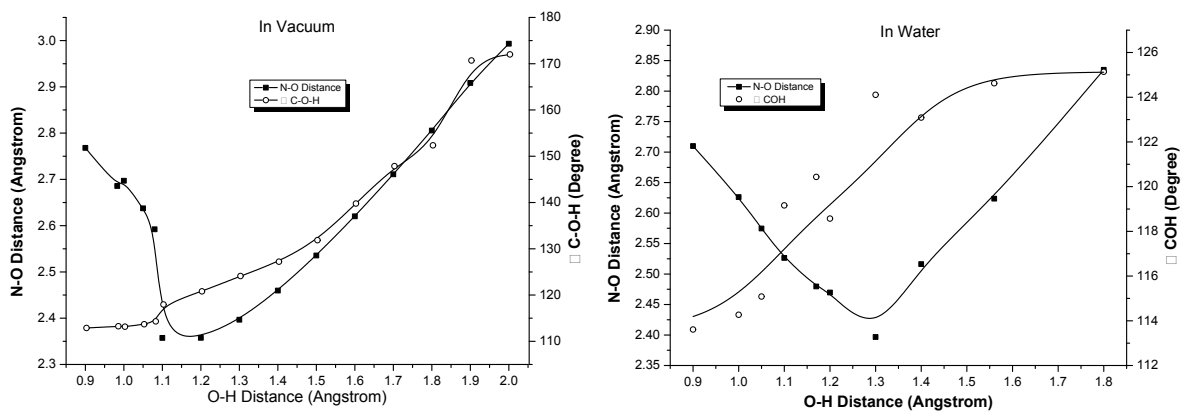

**Fig S2.** Behaviors of  $R_{O-N}$  and  $\angle_{COH}$  both in vacuum and water.
